# Supplementary figures and images for: The effect of salmon calcitonin against glutamate-induced cytotoxicity in the C6 cell line and the roles the inflammatory and nitric oxide pathways play
Source: Research Square preprint supplement (doi:10.21203/rs.3.rs-222852/v1), 2021-02-12

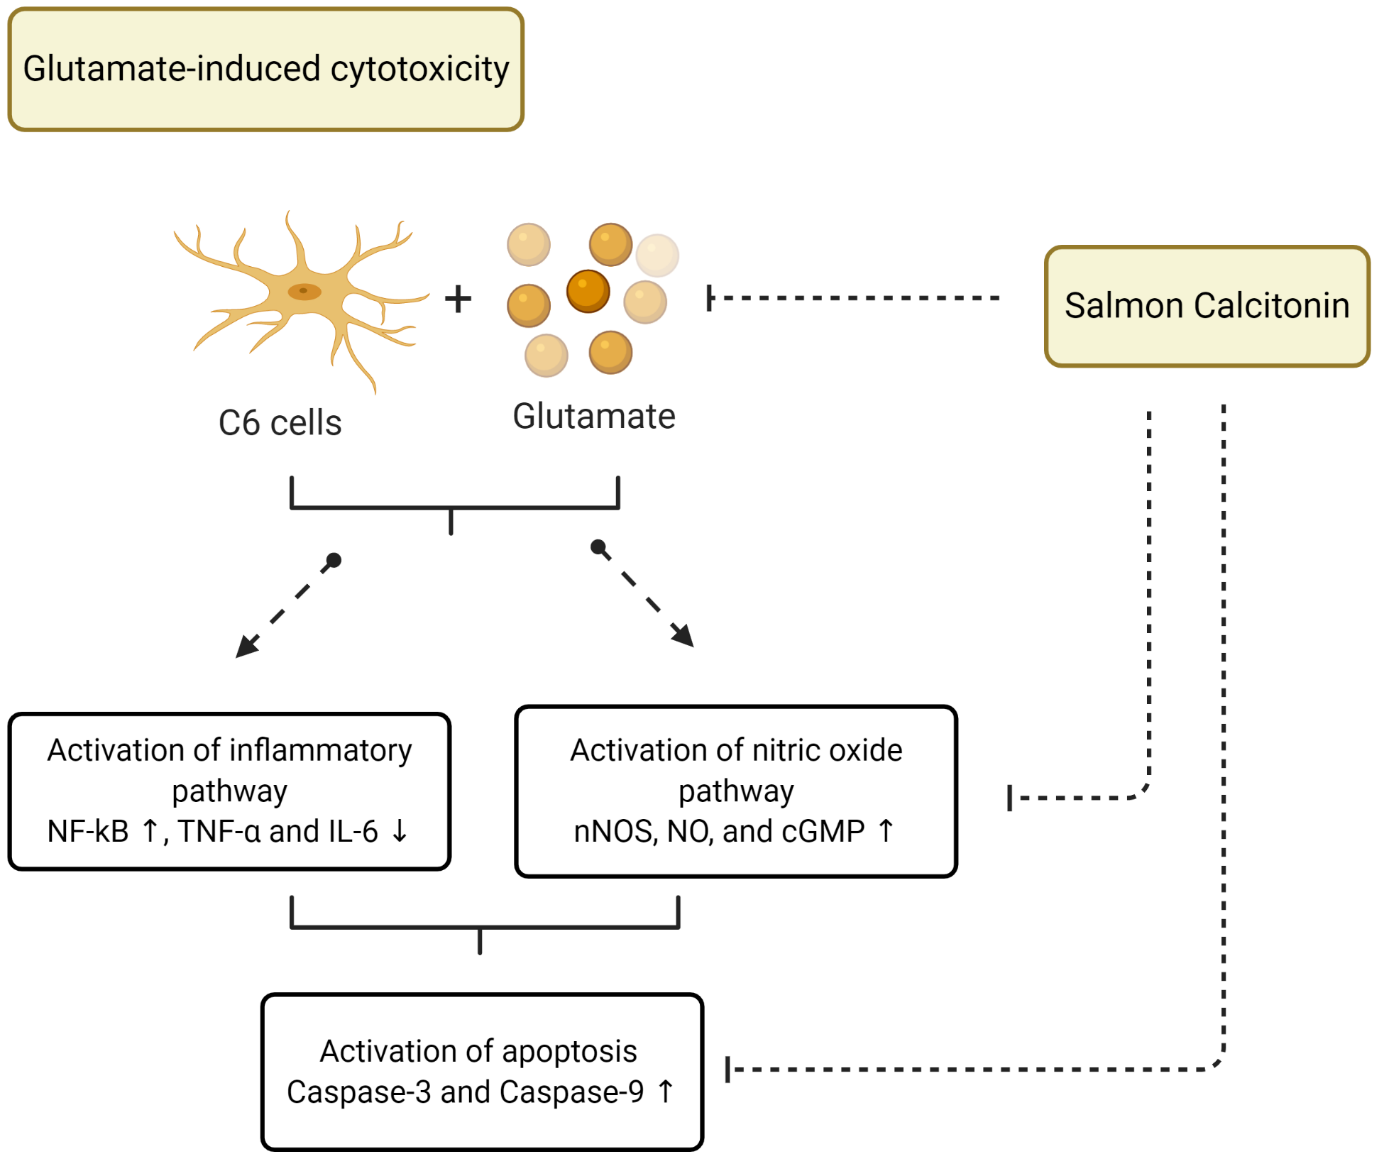

Supplement: Supplementary file 1 [file 33450632a295e3f2243b15a9.docx]
